## CORRECTION

# The cross-talk between NF- $\kappa$ B and HIF-1: further evidence for a significant liaison

A. GÖRLACH and S. BONELLO

Volume 412 (2008), pp. e17–e19

1. The name of the author S. Bonello was spelt incorrectly in the contents list and indexes in the print version of this paper. The online journal is not affected.

2. Important information and a reference were omitted from this online-only commentary in the first sentence of the third paragraph. The information (LPS), reference and the relevant citation in the text appear here:

A cross-talk between the NF- $\kappa$ B pathway and the HIF pathway has been documented extensively at the protein level in response to TNF- $\alpha$ , colchicine, LPS or HGF (hepatocyte growth factor) [13–16,16a].

### REFERENCE

- 16a Frede, S., Stockmann, C., Freitag, P. and Fandrey, J. (2006) Bacterial lipopolysaccharide induces HIF-1 activation in human monocytes via p44/42 MAPK and NF- $\kappa$ B. *Biochem. J.* **396**, 517–527
